# Supplementary material
Source: PubMed Central journal article supplement (PMC3890706)
Supplement: tlo0606_0715SD1.pdf [file tlo0606_0715SD1.pdf]

**Table W1.** Microarray Results Leading to the Identification of Altered 5hmC Level of LZTS1.

| Gene         | Mean Intensities in Glucosylated Sample Group | Mean Intensities in Unglucosylated Sample Group | P Value |
|--------------|-----------------------------------------------|-------------------------------------------------|---------|
| <i>LZTS1</i> | 410.57                                        | 112.38                                          | .0148   |
| <i>SOCS1</i> | 200.02                                        | 68.91                                           | .0369   |
| <i>TP53</i>  | 3564.11                                       | 905.54                                          | .0404   |

The absolute signal intensities and *P* values of three candidate genes for qPCR validation are given in Table 1.

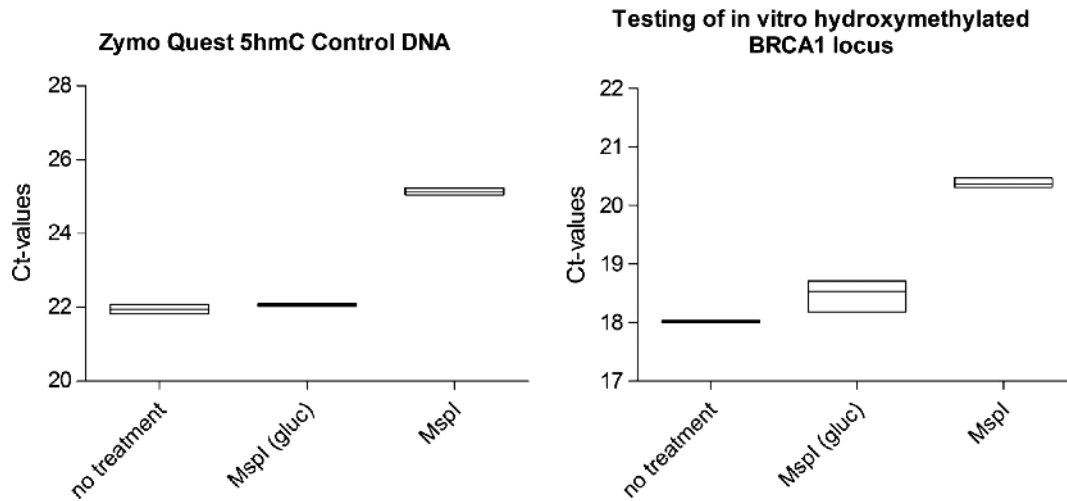

**Figure W1.** Quest 5-hmC Detection Kit testing using DNA supplied by Zymo Research and *in vitro* hydroxymethylated DNA of the BRCA1 PCR product.  $C_t$  values, unnormalized raw data; *MspI* (gluc) indicates positive reaction, where 5-hmC glucosyltransferase enzyme was added to the reaction; *MspI* indicates reactions with the same input DNA (*in vitro* hydroxymethylated) but without the enzyme.

**Table W2.** PCR Products plus Primer Sequences and PCR Efficiency.

| PCR Product  | Target | Left Primer           | Right Primer           | Tm | Slope | <i>d</i> | <i>R</i> <sup>2</sup> | PCR Efficiency |
|--------------|--------|-----------------------|------------------------|----|-------|----------|-----------------------|----------------|
| LZTS1_frag_A | DNA    | cccagtgatgtttgtgaat   | tctgggcagtagagaacaca   | 65 | -3.20 | 26.55    | 0.997                 | 105.20         |
| LZTS1_frag_B | DNA    | cttgctgccacagccttt    | ccggagatgaggctactgac   | 65 | -3.80 | 29.30    | 0.996                 | 83.38          |
| LZTS1_frag_C | DNA    | ggcttcgagtagaagctg    | agtcctgggagaagccaac    | 65 | -4.26 | 35.41    | 0.981                 | 71.58          |
| LZTS1_frag_D | DNA    | gcgtcagtagcctcatctcc  | tcttgaggtagggaggacttg  | 65 | -3.95 | 30.65    | 0.992                 | 79.20          |
| LZTS1_frag_E | DNA    | atgggcaagagcgaagact   | ctaaatccccctggacagr    | 65 | -3.34 | 26.77    | 0.997                 | 99.28          |
| LZTS1_frag_F | DNA    | cagactcctcaaaaccagagc | acttctgttcagggggact    | 65 | -4.01 | 35.35    | 0.992                 | 77.68          |
| LZTS1_frag_G | DNA    | ctggagcacagatgaagagg  | agggcagcaaatgagaagac   | 65 | -3.46 | 27.38    | 0.999                 | 94.43          |
| LZTS1_frag_H | DNA    | attcagtcctctgcccttg   | gcccttaatttgaaaagctg   | 65 | -3.41 | 25.64    | 0.999                 | 96.40          |
| LZTS1_frag_I | DNA    | caggagccatcctgcaact   | gcttcagctcctgctcctt    | 65 | -3.95 | 29.93    | 0.996                 | 79.07          |
| LZTS1_frag_J | DNA    | caaggagcaggagctgaag   | gctgtggtgctgtrgt       | 65 | -3.61 | 27.17    | 0.999                 | 89.22          |
| LZTS1_frag_K | DNA    | ctgcagcttcagcaggaga   | ctcgtaggacctgagcttgg   | 65 | -4.24 | 35.11    | 0.961                 | 72.16          |
| control      | DNA    | gctctgccatagatgcctttg | tcctctgttttgacctggggga | 65 | -3.48 | 29.29    | 0.998                 | 93.97          |
| LZTS1        | mRNA   | gactgtctctcattcctgc   | acaatgtrgtgcccaaccaag  | 60 | -4.14 | 34.76    | 0.996                 | 74.21          |
| TET1         | mRNA   | ccggcgcgagrtggaaagt   | aaggtrtttggctgctggccg  | 60 | -3.81 | 32.52    | 0.994                 | 82.86          |
| GAPDH        | mRNA   | atcactgccaccagaagac   | atgaggtccaccacctgtt    | 60 | -3.63 | 30.04    | 0.993                 | 88.41          |

“Target” indicates if primer is specific to mRNA of DNA; “Tm” reflects the annealing temperature that was applied to perform qPCR; “slope” represents slope of standard curve; *d* gives the intercept point of the standard curve and the *y*-axis; *R*<sup>2</sup> indicates correlation coefficient.

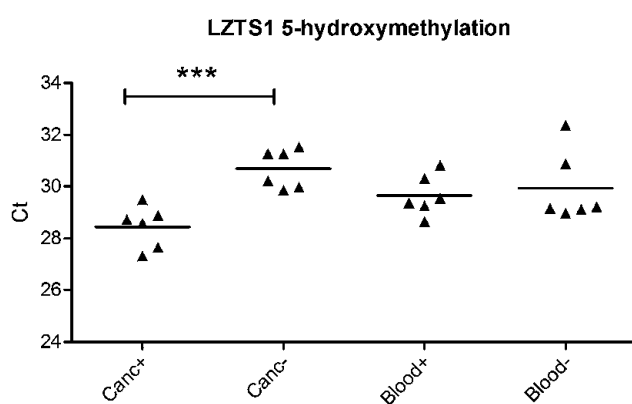

**Figure W2.** qPCR validation of LZTS1 on the discovery sample set (previous section) shows changed 5hmC levels in cancer compared to no change in 5hmC content in blood of healthy donors. Canc+ indicates positive reaction inclusive of glucosyltransferase enzyme; canc- indicates negative reaction without the enzyme.

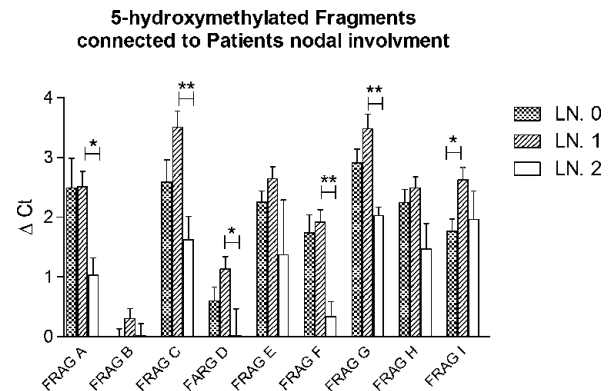

**Figure W3.** LZTS1 5-hydroxymethylation in cancerous breast tissue. 5-Hydroxymethylated fragments correlate to patient’s lymph node affection.  $\Delta C_t$  method was applied to minimize the experimental bias and varying DNA concentrations.  $\Delta C_t$  values were obtained by qPCR. The negative reaction of each sample was then subtracted from the positive (glucosylated) sample and plotted as the mean difference of each sample group. Fragments A to I reflect the different qPCR-tested regions of the LZTS1 locus. LN0, patients with no lymph node involvement detected (*n* = 26); LN1, patients with lymph node affection of clinical grade 1 (*n* = 39); LN2, patients with local lymph node affection of grade 2 (*n* = 8); error bars indicate the SEM; \**P* < .05 and \*\**P* < .01.

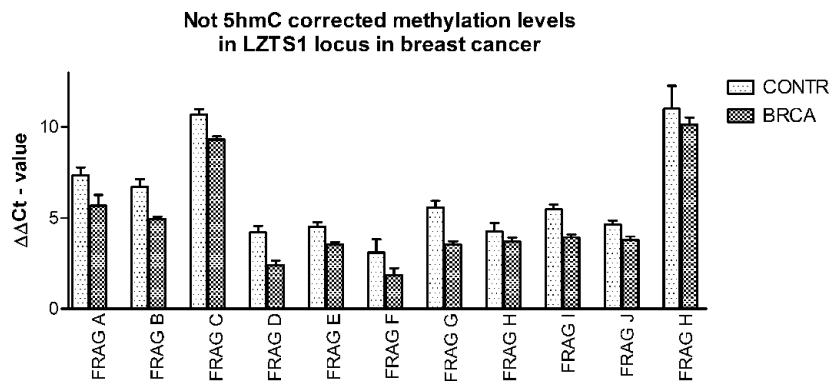

**Figure W4.** Methylation levels of LZTS1 locus; identical qPCR assays (fragments A-K) such as for 5hmC assessment were used.  $\Delta C_t$  methodology was applied to minimize the experimental bias and varying DNA concentrations.  $\Delta\Delta C_t$  values were obtained by subtraction of the negative untreated sample from the *HpaII* digested sample values. The effect of 5hmC was not considered. The plot reflects a combination of 5hmC and 5mC of the LZTS1 locus.
